# Supplementary material for: Highly efficient and stable Ag/AgIO3particles for photocatalytic reduction of CO2under visible light
Source: Royal Society of Chemistry journal article supplement (doi:10.1039/c4nr02450h), 2014-07-25
Supplement: c4nr02450h1.pdf [file c4nr02450h1.pdf]

*Electronic Supplementary Information (ESI)*

**A highly efficient and stable Ag/AgIO<sub>3</sub> particles for photocatalytic  
reduction of CO<sub>2</sub> under visible light**

Zhiqiao HE, Da WANG, Huiying FANG, Jianmeng CHEN and Shuang SONG\*

College of Biological and Environmental Engineering, Zhejiang University of  
Technology, Hangzhou 310032, People's Republic of China

\* Corresponding author:

Shuang SONG

Tel.: 86-571-88320726; Fax: 86-571-88320276.

E-mail: ss@zjut.edu.cn

## **Experimental Section**

### **Preparation and characterization of the catalysts**

AgIO<sub>3</sub> powder was prepared by solid-state ion-exchange method. KIO<sub>3</sub> (1.51 g) and AgNO<sub>3</sub> (1.20 g) were mixed thoroughly in a mortar until uniform solid particles were formed. The resulting white precipitate was washed with deionized water to dissolve any unreacted raw material. To prepare the Ag/AgIO<sub>3</sub> particles, 50 mL of 3.5 mM hydrazine hydrate was added dropwise with vigorous stirring to 100 mL of aqueous AgIO<sub>3</sub> dispersion. The resulting brown suspension was then washed with deionized water several times and finally dried at 60 °C for 24 h. Theoretically, the catalyst has an Ag:AgIO<sub>3</sub> molar ratio of 1:9. A reference photocatalyst of N-TiO<sub>2</sub> was prepared by following the procedure reported by Kontos and coworkers.<sup>S1</sup>

Ag/AgIO<sub>3</sub> particle formation was confirmed by X-ray diffraction (XRD, Thermal ARL X-ray diffractometer, Thermo, France) using Cu K $\alpha$  radiation (45 kV and 40 mA). Measurements were done in the  $2\theta$  range of 10° to 80° at a scanning speed of 2° min<sup>-1</sup> at room temperature. Surface morphologies of the synthesized particles were observed under a scanning electron microscope (SEM, S-4800, Hitachi, Japan) and a transmission electron microscope with 0.20 nm point resolution (Tecnai G2 F30 S-Twin, Philips-FEI, Netherlands) at an acceleration voltage of 300 kV. Surface electronic states were analyzed by X-ray photoelectron spectra (XPS) on a PHI 5000C ESCA system (Perkin-Elmer, USA) equipped with a polychromatic Mg K $\alpha$  radiation source operated at 1253.6 eV. Diffuse reflectance spectra were measured using a UV-vis spectrometer (TU-1901, Pgeneral, China). The specific surface area, which was based on nitrogen adsorption, was measured by using a gas adsorption analyzer (ASAP 2010 Analyzer, Micromeritics, USA) according to the Brunauer–Emmett–Teller (BET) method. The Mott–Schottky plot was obtained on an electrochemical workstation (CHI 660D, Shanghai Chenhua, China) using a standard three-electrode cell with a pressed tablet of AgIO<sub>3</sub> as working electrode, a platinum plate as counter electrode, and a saturated calomel electrode (SCE) as reference electrode. The electrolyte was an aqueous 0.1 M Na<sub>2</sub>SO<sub>4</sub> solution, which was purged with nitrogen before measurements. Mott–Schottky experiments were done by measuring the frequency response at 10 Hz.

### **Photocatalytic reaction**

Photocatalytic reduction of CO<sub>2</sub> was carried out in a stainless steel reactor (8 cm inner diameter, 5.5 cm inner height, and 260 mL effective capacity) equipped with an

O-ring sealed quartz window at the top to admit light. A 500 W Xe arc lamp (Beijing Electric Light Sources Research Institute, China) positioned 20 cm above the vessel was used as a source of simulated solar light. To obtain visible light, UV light was removed by inserting a UV cutoff filter (wavelength > 400 nm) across the light path. In our experiment, the light flux entering the reactor was determined to be  $2.551 \times 10^{-6}$  einstein  $\text{min}^{-1} \text{cm}^{-2}$  by using a visible-light radiometer (FZ-A, Beijing Normal University, China). A self-contained water jacket was connected to a circulating water bath thermostated at  $25 \pm 1$  °C. In a typical run, 0.3 g of powdered catalyst was evenly dispersed on glass fiber (4 cm  $\times$  4 cm) that was placed in the photoreactor facing the quartz window. Prior to irradiation, compressed CO<sub>2</sub> (99.99%, Hangzhou Jingong Special Gas Co., Ltd., China), whose flow was regulated by a mass flow controller, was bubbled through a water reservoir to presaturate the CO<sub>2</sub> with water (~3.2% H<sub>2</sub>O, v/v). After the CO<sub>2</sub> was purged for 30 min, the gas valves on both sides of the reactor were closed to seal the reactor and the Xe lamp was switched on. Magnetic stirring was used to agitate the mixture of CO<sub>2</sub> and water vapor during irradiation. At preset intervals, gaseous samples from the vessel were taken by a 1 mL gastight syringe (P/N 5190-1531, Agilent, USA) and then manually injected into a gas chromatography (GC).

**Table S1** QY of photoreduction of CO<sub>2</sub> over Ag/AgIO<sub>3</sub> particles under monochromatic light of various wavelengths.

| wavelength (nm) | incident photon flux (einstein $\text{min}^{-1} \text{cm}^{-2}$ ) | product yield ( $\mu\text{mol g}^{-1}$ ) |                  | QY (%)           |
|-----------------|-------------------------------------------------------------------|------------------------------------------|------------------|------------------|
|                 |                                                                   | CH <sub>4</sub>                          | CO               |                  |
| 430             | $1.832 \times 10^{-7}$                                            | $2.07 \pm 0.22$                          | n. d.            | $0.23 \pm 0.024$ |
| 460             | $2.791 \times 10^{-7}$                                            | $3.51 \pm 0.20$                          | $0.60 \pm 0.070$ | $0.25 \pm 0.016$ |
| 490             | $3.403 \times 10^{-7}$                                            | $4.33 \pm 0.43$                          | $0.64 \pm 0.086$ | $0.26 \pm 0.026$ |
| 520             | $3.226 \times 10^{-7}$                                            | $4.83 \pm 0.51$                          | $0.71 \pm 0.041$ | $0.31 \pm 0.032$ |
| 550             | $3.389 \times 10^{-7}$                                            | $4.56 \pm 0.63$                          | $0.64 \pm 0.082$ | $0.28 \pm 0.038$ |
| 580             | $4.275 \times 10^{-7}$                                            | $5.57 \pm 0.86$                          | $0.92 \pm 0.132$ | $0.27 \pm 0.018$ |
| 610             | $3.059 \times 10^{-7}$                                            | $2.90 \pm 0.16$                          | $0.47 \pm 0.072$ | $0.20 \pm 0.012$ |
| 700             | $1.285 \times 10^{-7}$                                            | $0.87 \pm 0.11$                          | n. d.            | $0.14 \pm 0.017$ |

Photocatalytic action spectra were obtained by using monochromatic light (light

width,  $\pm 15$  nm) from a Xe lamp with a monochromator. The irradiation intensity of monochromatic light below the entrance window of the photoreactor is shown in Table S1. The incident photon flux at the wavelength range of 430–700 nm was in the range of  $1.285\text{--}4.275 \times 10^{-7}$  einstein  $\text{s}^{-1} \text{cm}^{-2}$ .

The quantum yield (QY) for  $\text{CO}_2$  reduction was obtained based on the molar production of carbon-containing compounds, according to eqn (S1):

$$\text{QY} = \frac{\text{number of moles of electrons reacted}}{\text{number of moles of incident photons}} \quad (\text{S1})$$

The turnover number (TON) is defined as the number of product molecules of the system over the number of active sites exposed to light at a certain time.

### Methods of sample analysis

$\text{CO}$  was analyzed by GC on an Agilent 7890B (USA) equipped with a thermal conductivity detector and an HP-PLOT MoleSieve column ( $30 \text{ m} \times 320 \mu\text{m} \times 12 \mu\text{m}$ ).  $\text{CH}_4$  was analyzed by GC on a Shimadzu 2014 (Japan) equipped with a flame ionization detector and an RTX-1701 capillary column ( $30 \text{ m} \times 250 \mu\text{m} \times 25 \mu\text{m}$ ).

### Calculation of the TON under visible-light irradiation

The  $\text{Ag}/\text{AgIO}_3$  catalyst has an  $\text{Ag}:\text{AgIO}_3$  molar ratio of 1:9. Since the molar masses of  $\text{AgIO}_3$  and  $\text{Ag}$  are 282.77 and 107.87  $\text{g mol}^{-1}$ , respectively, we can convert the  $\text{Ag}:\text{AgIO}_3$  mole ratio into mass ratio according to eqn (S2)

$$(1 \times 107.87)/(9 \times 282.77) = 0.042386 \quad (\text{S2})$$

The densities of  $\text{AgIO}_3$  and  $\text{Ag}$  are 5.525 and 10.49  $\text{g cm}^{-3}$ ; thus, the  $\text{Ag}:\text{AgIO}_3$  volume ratio is

$$(0.042386 \times 5.525)/10.49 = 0.022324 \quad (\text{S3})$$

The SEM image shows that the  $\text{AgIO}_3$  sheets have a thickness of  $\sim 150$  nm and that the  $\text{Ag}$  particles have an average diameter  $\sim 30$  nm. Thus, the number of  $\text{Ag}$  particles per square centimeter of  $\text{AgIO}_3$  is approximately

$$\frac{0.022324}{\left(\frac{4}{3} \times \pi \times \left(\frac{30}{2}\right)^3\right)} / \left(\frac{1}{150} \times 2\right) = 1.1843 \times 10^{10} \text{ cm}^{-2} \quad (\text{S4})$$

Considering that the photocatalysts were equally dispersed on the  $16 \text{ cm}^2$  glass fiber, the number of  $\text{Ag}$  particles that are effective for photocatalytic reduction of  $\text{CO}_2$  is

$$1.1843 \times 10^{10} \times 16 = 1.8949 \times 10^{11} \quad (\text{S5})$$

Each Ag atom exposed to visible light may be regarded as a potential active site. Since the estimated length of the unit-cell edge of the face-centered cubic Ag crystal is 0.40772 nm, the number of irradiated active sites is

$$[1.8949 \times 10^{11} \times 4 \times \pi \times (30/2)^2 \times 2] / (2 \times 0.40772^2) = 3.2213 \times 10^{15} \quad (\text{S6})$$

Thus, the total number of moles of active sites is

$$3.2213 \times 10^{15} / 6.0221 \times 10^{23} = 5.3549 \times 10^{-3} \mu\text{mol} \quad (\text{S7})$$

The total CH<sub>4</sub> and CO yields on Ag/AgIO<sub>3</sub> catalyst under visible-light irradiation after 240 min are 7.32 and 0.89 μmol, respectively. Consequently, The TON for CH<sub>4</sub> is

$$7.32 / 5.3549 \times 10^{-3} = 1367$$

and the TON for CO is

$$0.89 / 5.3549 \times 10^{-3} = 167$$

## Reference

- S1 A. I. Kontos, A. G. Kontos, Y. S. Raptis and P. Falaras, *Phys. Status. Solidi-R*, 2008, **2**, 83.
